# Supplementary material for: Laser Therapy for Vulvar Lichen Sclerosus, a Systematic Review
Source: MDPI journal article supplement (doi:10.3390/life13112146), 2023-10-31
Supplement: s1 [file s1]

**Supplementary File S1.** Search strategy.

| Database       | Query/Search Strategy                                                                                                                                                                                                                                 | Items<br>founds/Results | Search<br>time limits |
|----------------|-------------------------------------------------------------------------------------------------------------------------------------------------------------------------------------------------------------------------------------------------------|-------------------------|-----------------------|
| MEDLINE        | ("Lichen Sclerosus et Atrophicus"[MeSH Terms] OR "Vulvar Lichen Sclerosus"[MeSH Terms] OR ((“lichen”[all] OR sclero*[all]) AND (vulv*[all] or genital*[all]) NOT (“male”[all] OR “balanitis”[all]))) AND (“Laser Therapy”[MeSH Terms] OR laser*[all]) | 96                      | January, 2023         |
| Embase         | Embase: (('lichen sclerosus et atrophicus'/exp) OR ('lichen sclerosus') OR ('vulva kraurosis'/exp) OR (('lichen' OR 'sclero*') AND ('vulv*' OR 'genital*')) AND ('laser therapy'/exp OR 'laser'/exp OR 'laser*'))                                     | 408                     | January, 2023         |
| CENTRAL        | ("lichen sclero*" OR "Lichen Sclerosus et Atrophicus" OR "Vulvar Lichen Sclerosus" OR ((lichen OR sclero*) AND (vulv* OR genital*))) AND (laser* OR “laser therapy”)                                                                                  | 36                      | January, 2023         |
| Web of Science | TS=((lichen sclerosus) OR ((lichen OR sclero*) AND (vulv* OR genital*))) AND TS=(laser*)                                                                                                                                                              | 243                     | January, 2023         |
| Scopus         | ALL (((lichen OR sclerosus) AND (vulv* OR genital*)) AND (laser*))                                                                                                                                                                                    | 1,488                   | January, 2023         |
| Total          | 2,271                                                                                                                                                                                                                                                 |                         |                       |
